# Supplementary material for: A low dose, highly selective and sensitive colorimetric and fluorescent probe for biothiols and its application in bioimaging
Source: Royal Society of Chemistry journal article supplement (doi:10.1039/c4cc04978k), 2014-01-01
Supplement: c4cc04978k1.pdf [file c4cc04978k1.pdf]

## **Electronic Supplementary Information (ESI)**

for

### **A low dose, highly selective and sensitive colorimetric and fluorescent probe for biothiols and its application for bioimaging**

Qiong Zhang, Dehuan Yu, Shuangshuang Ding and Guoqiang Feng\*

*Key Laboratory of Pesticide and Chemical Biology of Ministry of Education, College of Chemistry, Central China*

*Normal University, 152 Luoyu Road, Wuhan 430079, P. R. China. E-mail: [gf256@mail.ccnu.edu.cn](mailto:gf256@mail.ccnu.edu.cn)*

#### **Contents**

|                                                     |           |
|-----------------------------------------------------|-----------|
| <b>1. Experimental general</b> .....                | Page 2-3  |
| <b>2. Synthesis of compound 2 and probe 1</b> ..... | Page 3-8  |
| <b>3. Additional studies</b> .....                  | Page 9-15 |

## 1. Experimental general

All reagents were purchased from commercial suppliers and used without further purification. All aqueous solutions and buffers were prepared with using distilled water that had been passed through a Millipore-Q ultrapurification system. TLC analysis was performed using precoated plates. Melting points were determined using an X-4 apparatus and are not corrected. NMR spectra were measured on a Varian Mercury 400 instrument, operating at 400 MHz for  $^1\text{H}$  NMR and 100 MHz for  $^{13}\text{C}$  NMR. IR spectra were recorded on a Perkin-Elmer Spectrum BX FT-IR spectrophotometer as KBr pellets and were reported in  $\text{cm}^{-1}$ . Electrospray mass spectra (ESI-MS) were acquired on Agilent 1100 Series LC/MS ion trap mass spectrometers and 6530 Accurate-Mass QTOF spectrometer coupled to an Agilent HPLC 1200 series. UV-vis spectra and fluorescent spectra were recorded on an Agilent Cary 100 UV-vis spectrophotometer and an Agilent Cary Eclipse fluorescence spectrophotometer, respectively. Both spectrophotometers are equipped with a temperature controller. Standard quartz cuvettes with a 10 mm lightpath were used for all optical measurements. Cell imaging was performed in an Olympus IX71 inverted fluorescence microscopy with a 20 $\times$  objective lens.

**Optical measurements:** Stock solutions of probe **1** (1 mM) were prepared in DMSO (HPLC grade). Stock solutions (0.01-10 M) of the analytes were prepared in ultrapure water. For optical measurements, a solution of probe **1** (10  $\mu\text{M}$  or as stated) was prepared in DMSO-PBS buffer (20 mM, pH 7.4, 1:1, v/v). Then 3.0 mL of the probe **1** solution was placed in a quartz cell until the temperature reached at 37  $^\circ\text{C}$  over a few minutes. The UV-vis or fluorescent spectra were then recorded upon addition of various analytes.

**Determination of the fluorescence quantum yield:** In our system, the fluorescence quantum yields of probe **1** ( $\Phi = 0.09$ ) and compound **2** ( $\Phi = 0.56$ ) were determined in DMSO-PBS buffer (20 mM, pH 7.4, 1:1, v/v), using rhodamine B ( $\Phi_f = 0.89$  in ethanol) as standard. The quantum yield was calculated using the following equation:

$$\Phi_x = \Phi_s(A_s F_x / A_x F_s) (n_x^2/n_s^2)$$

where,  $A_x$  and  $A_s$  are the absorbance of the sample and the reference, respectively, at

the same excitation wavelength,  $F_x$  and  $F_s$  are the corresponding relative integrated fluorescence intensities, and  $n$  is the refractive index of the solvent. Absorbance of sample and reference at their respective excitation wavelengths was controlled to be lower than 0.05.

**Cell imaging experiments:** HeLa cells were cultured in Dulbecco's Modified Eagle's Medium (DMEM) supplemented with 10% FBS (Fetal Bovine Serum), 100mg/mL penicillin and 100  $\mu$ g/mL streptomycin in a 5% CO<sub>2</sub>, water saturated incubator at 37 °C, and then were seeded in a 12-well culture plate for one night before cell imaging experiments. For living cells imaging experiment of probe **1**, cells were incubated with 1 $\mu$ M (or 10  $\mu$ M) of probe **1** (with 0.2% DMSO, v/v) for 60 min at 37 °C and washed three times with prewarmed PBS, and then imaged immediately. For N-ethylmaleimide (NEM) treated experiments, HeLa cells were pretreated with 0.5 mM NEM for 60 min at 37 °C, washed three times with prewarmed PBS, and then incubated with 10  $\mu$ M probe **1** for 60 min at 37 °C. Cell imaging was then carried out after washing cells with prewarmed PBS buffer.

## 2. Synthesis of compound **2** and probe **1**

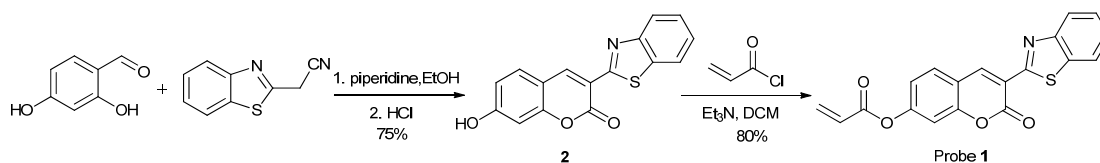

**Scheme S1.** Synthesis of probe **1**.

**Synthesis of 3-benzothiazolyl-7-hydroxycoumarin (2).** Compound **2** was synthesized in 75 % yield according to a previously reported method (Ref. W. Lin, L. Long and W. Tan, *Chem. Commun.*, 2010, **46**, 1503–1505). M.p. 304-306 °C. TLC (silica plate):  $R_f$  0.3 (petroleum ether : ethyl acetate 2:1, v/v); <sup>1</sup>H NMR (400 MHz, *d*<sub>6</sub>-DMSO, Me<sub>4</sub>Si):  $\delta$  (ppm) 9.14 (d,  $J$  = 1.7 Hz, 1H), 8.15 (d,  $J$  = 7.9 Hz, 1H), 8.04 (d,  $J$  = 8.2 Hz, 1H), 7.92 – 7.89 (m, 1H), 7.55 (t,  $J$  = 7.4 Hz, 1H), 7.45 (t,  $J$  = 7.1 Hz, 1H), 6.95 (d,  $J$  = 8.6 Hz, 1H), 6.90 (s, 1H). <sup>13</sup>C NMR (100 MHz, *d*<sub>6</sub>-DMSO, Me<sub>4</sub>Si):  $\delta$  (ppm) 188.3, 164.2, 160.9, 160.2, 156.2, 152.2, 143.0, 136.0, 132.3, 126.9, 125.4, 122.5, 115.0, 114.7, 111.8, 102.5. IR (KBr)  $\nu_{max}$  (cm<sup>-1</sup>): 2965, 2737, 1721 (s), 1707, 1615, 1599, 1585, 1558, 1525, 1452 (s), 1344, 1298, 1257 (s), 858, 755, 508. EI-MS:  $m/z$  found 295.15 (M<sup>+</sup>, 100%), 267.14 (M<sup>+</sup> - C<sub>2</sub>H<sub>4</sub>, 35%).

**Synthesis of probe 1.** To a solution of compound **2** (147 mg, 0.5 mmol) in dry dichloromethane (5 mL) was added acryloyl chloride (90  $\mu$ L) and Et<sub>3</sub>N (150  $\mu$ L). The resulting mixture was stirred at room temperature until the reaction was complete (monitored by TLC in a silica plate, the R<sub>f</sub> of the starting material **2** is 0.3 using petroleum ether : ethyl acetate 1:1 (v/v) as mobile phase. Water (10 mL) was used to wash the resulting solution three times, and the dichloromethane phase was dried over Na<sub>2</sub>SO<sub>4</sub>. After filtered and removal of the organic solvent, a yellow solid product was formed, which can be further purified by recrystallization from ethanol to afford the pure product (140 mg, 80%). M.p. 227-229 °C; TLC (silica plate): R<sub>f</sub> 0.7 (petroleum ether : ethyl acetate 2:1, v/v); <sup>1</sup>H NMR (400 MHz, CDCl<sub>3</sub>, Me<sub>4</sub>Si) :  $\delta$  (ppm) 9.06 (s, 1H), 8.08 (d, *J* = 8.2 Hz, 1H), 7.98 (d, *J* = 7.9 Hz, 1H), 7.75 (d, *J* = 8.5 Hz, 1H), 7.54 (t, *J* = 7.6 Hz, 1H), 7.43 (t, *J* = 7.5 Hz, 1H), 7.30 (s, 1H), 7.21 (dd, *J* = 8.4, 1.6 Hz, 1H), 6.68 (d, *J* = 17.3 Hz, 1H), 6.36 (dd, *J* = 17.2, 10.4 Hz, 1H), 6.12 (d, *J* = 10.4 Hz, 1H). <sup>13</sup>C NMR (100 MHz, *d*<sub>6</sub>-DMSO)  $\delta$  182.1, 164.2, 160.3, 159.8, 154.6, 154.5, 152.5, 142.2, 136.5, 135.1, 131.9, 127.8, 127.3, 126.1, 123.1, 120.0, 119.5, 117.5, 110.7, 55.49. IR (KBr)  $\nu_{\text{max}}$  (cm<sup>-1</sup>): 3440 (br s), 2978, 2942, 2739, 2677, 2604, 2494, 1732 (s), 1610, 1477, 1398, 1156, 1037, 767; EI-MS: *m/z* found 349.17 (M<sup>+</sup>, 40%), 295.19 (M<sup>+</sup> - C<sub>2</sub>H<sub>3</sub>CO, 100%). HR-MS Calc. for C<sub>19</sub>H<sub>12</sub>NO<sub>4</sub>S<sup>+</sup> (M + H<sup>+</sup>) 350.04815, found 350.04805.

### Structure characterizations for compound **2** and probe **1**

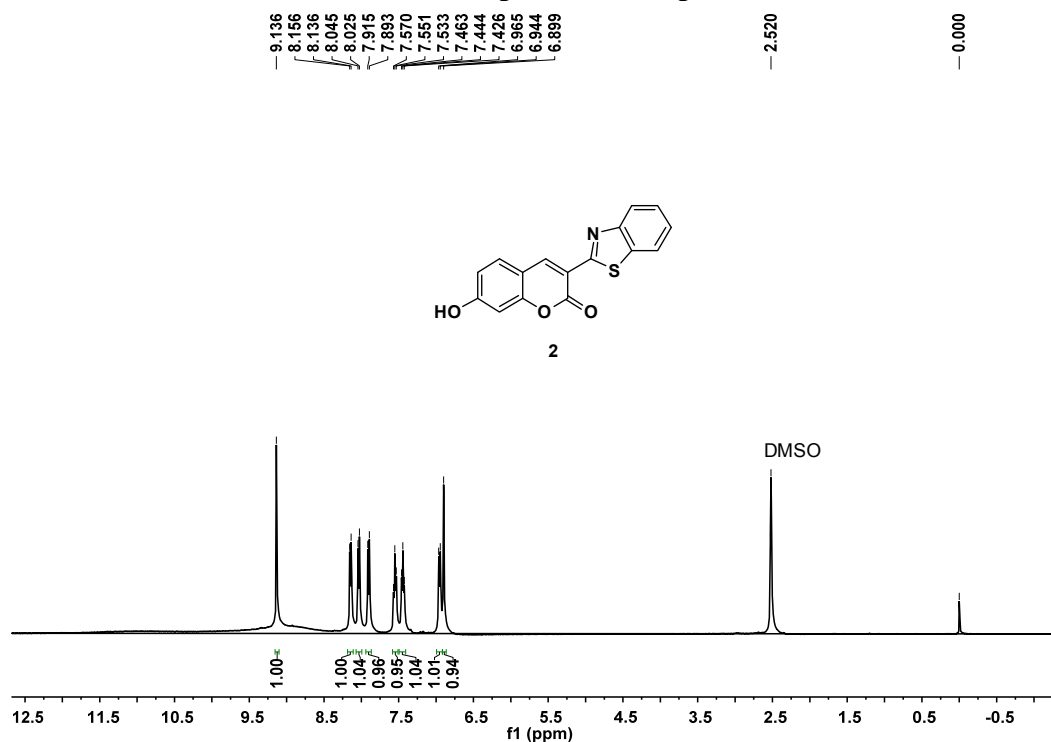

<sup>1</sup>H-NMR spectrum of compound **2** in *d*<sub>6</sub>-DMSO

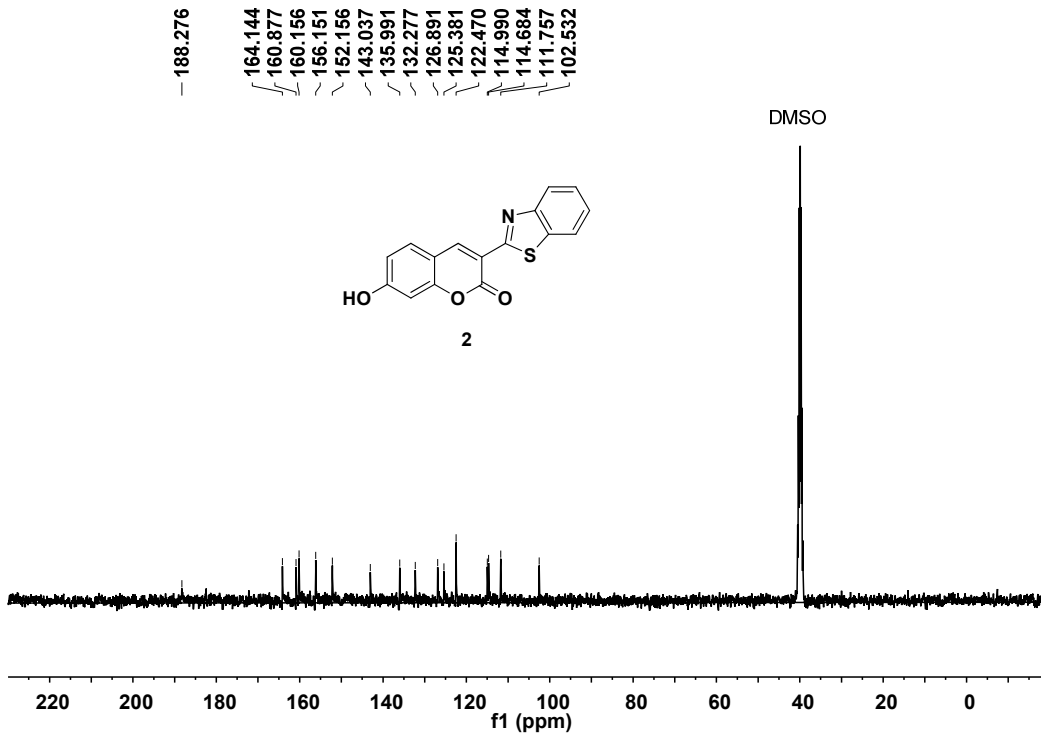

<sup>13</sup>C-NMR spectrum of compound **2** in *d*<sub>6</sub>-DMSO

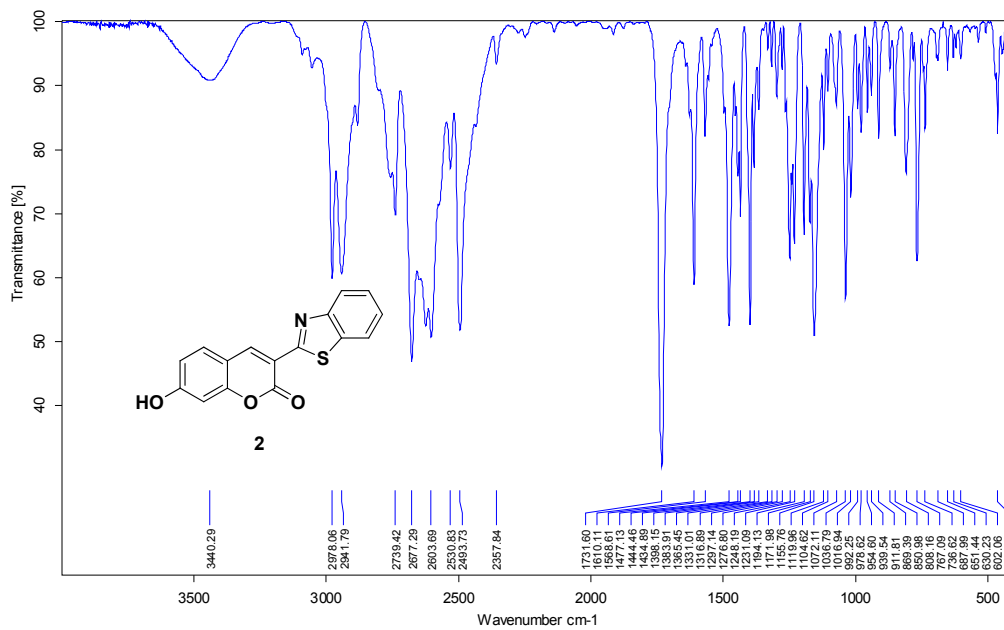

IR spectrum of compound **2**

ZQ-25 #700 RT: 2.94 AV: 1 SB: 754 0.29-2.70, 3.09-3.80 NL: 5.89E5  
T: + c Full ms [40.00-450.00]

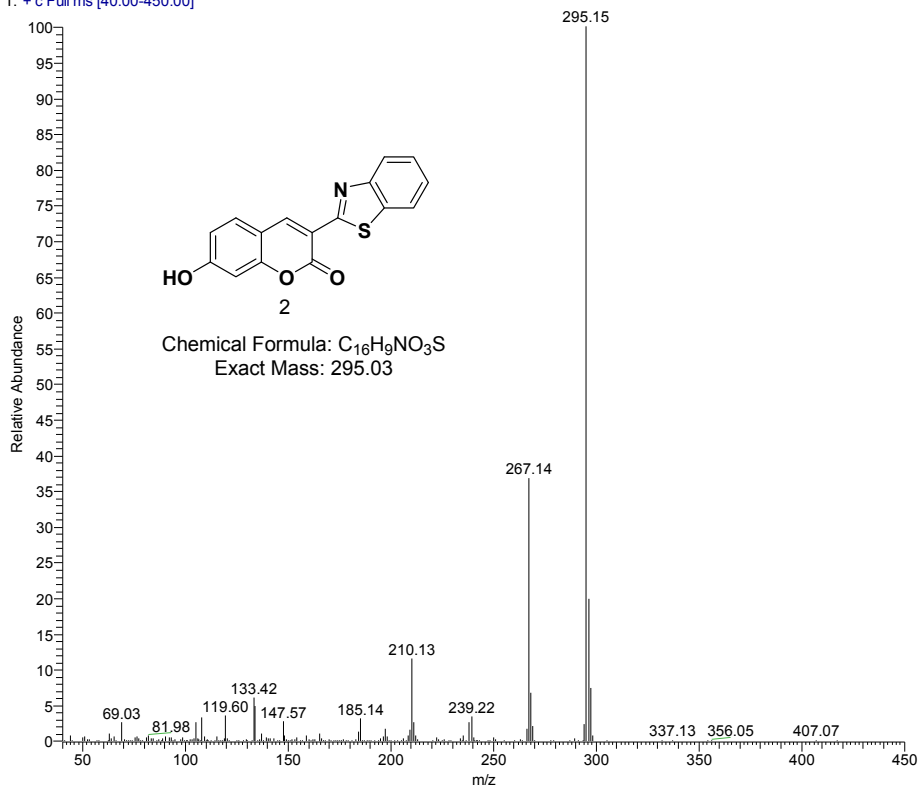

Mass spectrum of compound 2

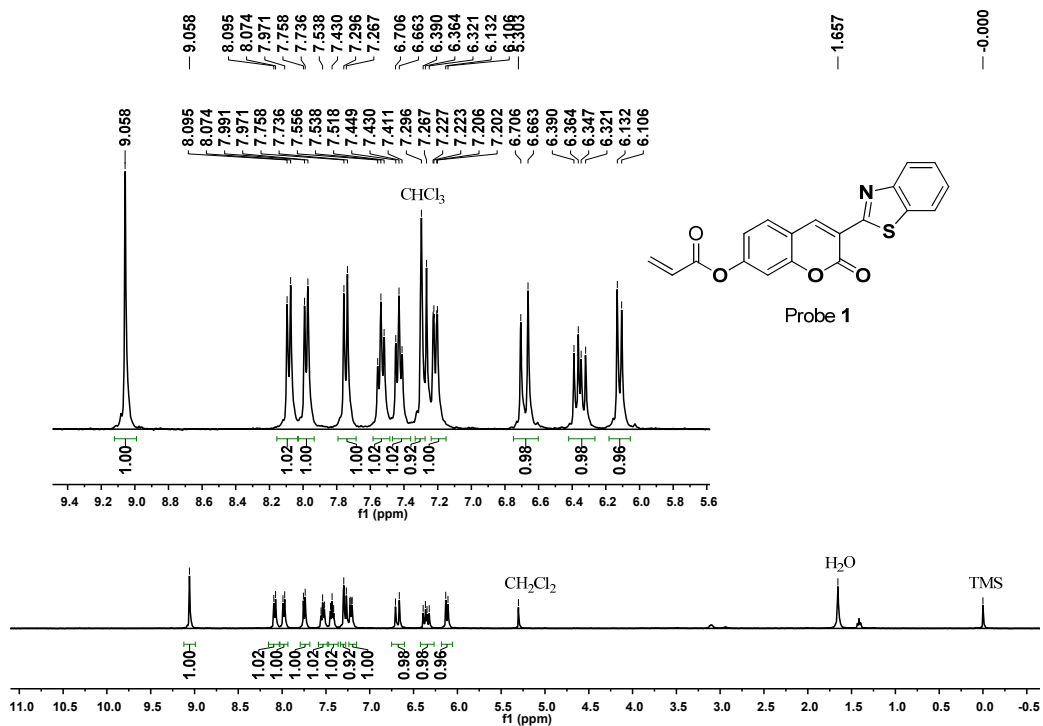

<sup>1</sup>H-NMR spectrum of probe 1 in CDCl<sub>3</sub>

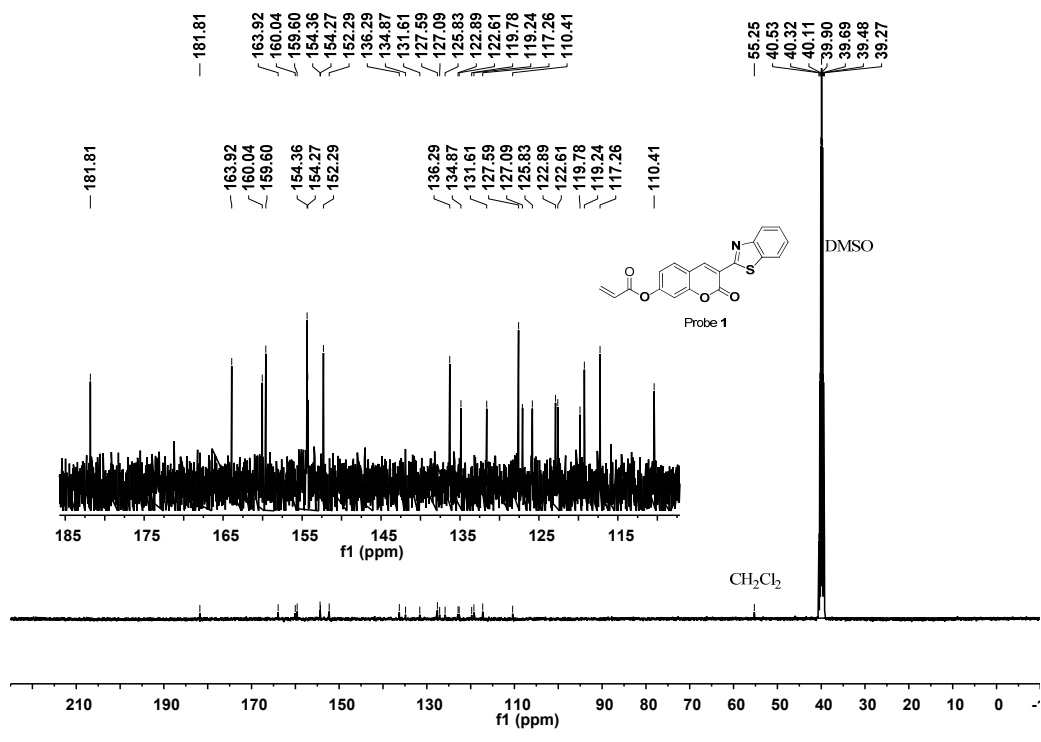

<sup>13</sup>C-NMR spectrum of probe 1 in *d*<sub>6</sub>-DMSO

ZQ-26 #564 RT: 2.63 AV: 1 SB: 618 0.09-2.57, 3.04-3.40 NL: 1.05E5  
T: + c Full ms [40.00-500.00]

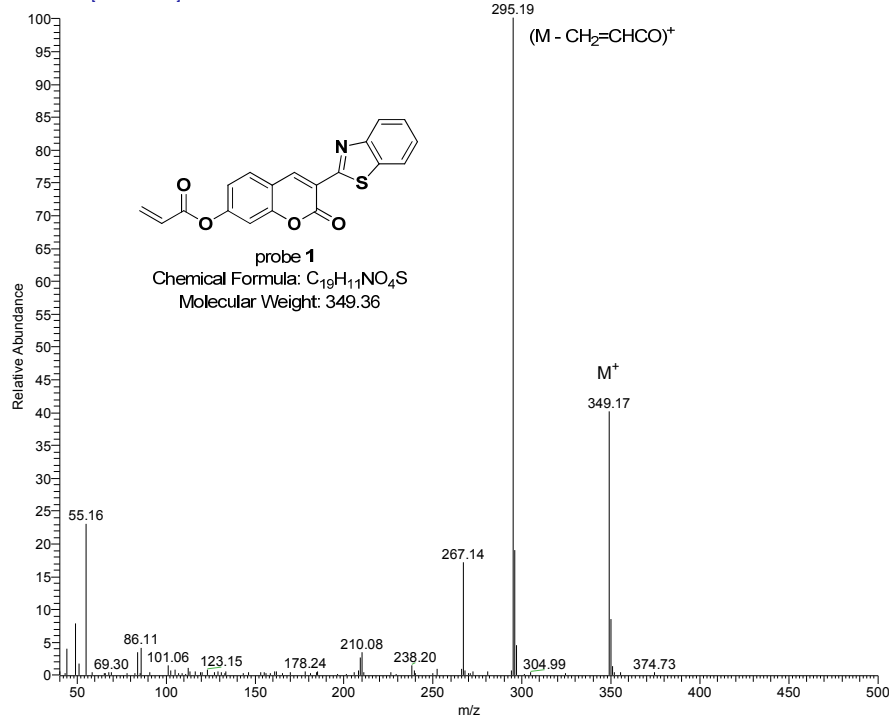

MS (EI) spectrum of probe 1

ZQ-26\_140329233322 #312-324 RT: 4.58-4.76 AV: 13 NL: 1.53E7  
T: FTMS + p ESI Full ms [50.00-2000.00]

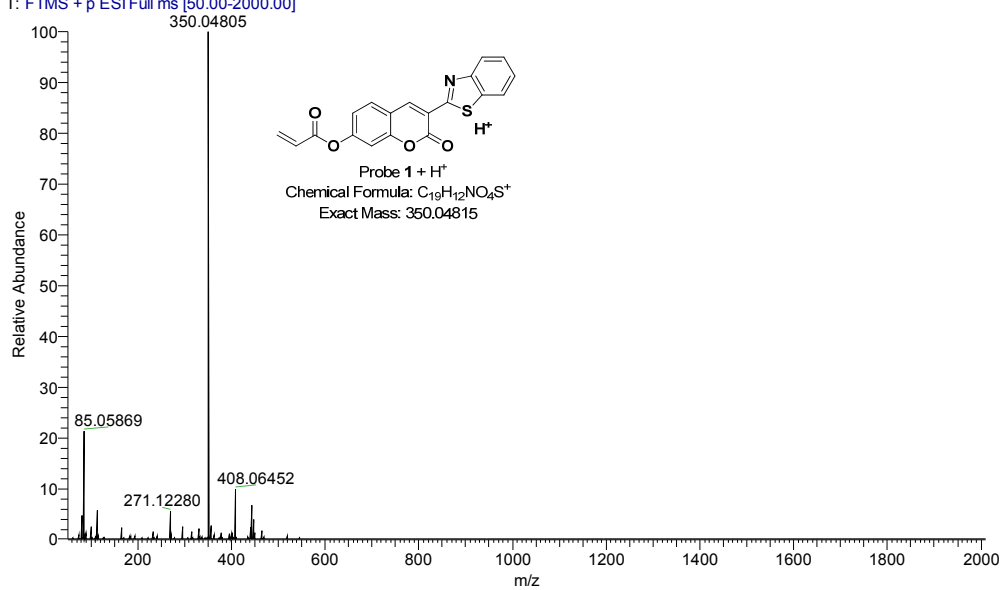

HR-MS spectrum of probe 1

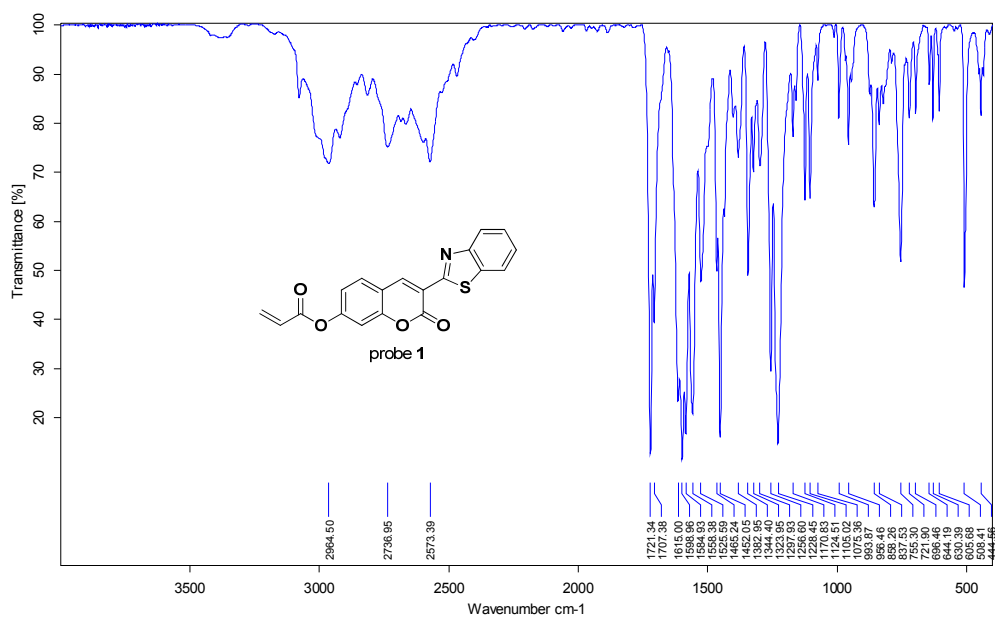

IR spectrum of probe 1



### 3. Additional studies

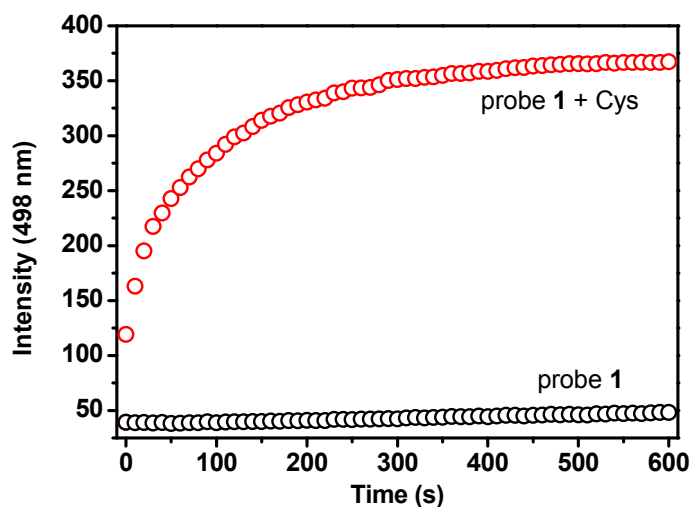

**Fig. S1** Fluorescent kinetics of probe **1** (10  $\mu$ M) in the absence and presence of 50  $\mu$ M of Cys in DMSO-PBS buffer (20 mM, pH 7.4, 1:1, v/v) at 37  $^{\circ}$ C. The spectra were monitored at 498 nm and collected at 10 s intervals, respectively, with  $\lambda_{\text{ex}} = 458$  nm;  $d_{\text{ex}} = d_{\text{em}} = 2.5$  nm.

#### Sensing mechanism of probe **1** for Cys

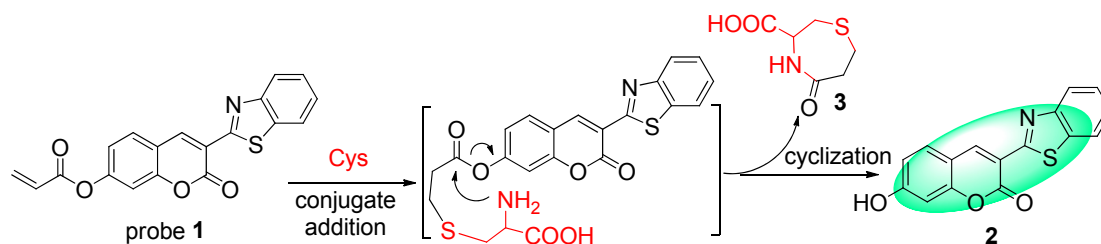

**Scheme S2.** A proposed mechanism for sensing of Cys by probe **1**.

To a 150 mL flask, probe **1** (0.14 g, 0.4 mmol) and Cys (1.25 eq) were combined in 100 mL of MeOH : H<sub>2</sub>O (90 : 10, v/v) solution, and the mixture stirred at room temperature for 1 h. Then, Et<sub>3</sub>N (30  $\mu$ L) was added and the solution stirred ca. 2 h. The solvents was removed under reduced pressure and the crude product was subjected to column chromatography (eluted with CH<sub>2</sub>Cl<sub>2</sub>: MeOH, 5 : 1, v/v) to afford (58 mg, 49.2%) of product **A** and 18 mg of product **B** as an off-white solid. Product **A** was checked by TLC, <sup>1</sup>H NMR and Mass spectra, which was proved to be **2** by comparison with those of reference sample of compound **2**. Product **B** was proved to

be **3** by its  $^1\text{H}$  NMR spectrum with comparison to that of previously reported spectrum of **3**. See below.

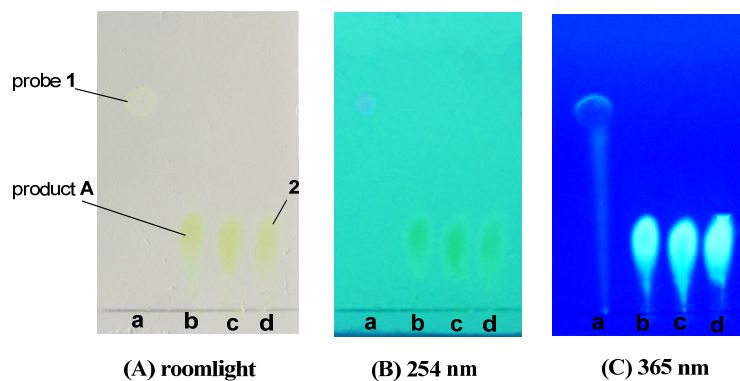

**Fig. S2** TLC analysis of the isolated product **A** from the reaction of probe **1** and Cys. plate under different light used to compare probe **1**, the reference sample of compound **2** and the isolated reaction product of probe **1** and Cys. (A) under room light, (B) under light of 254 nm, (C) under light of 365 nm. Spots on the TLC plate are: a. probe **1**, b. the reaction product **A**, c. mixture of product **A** and the reference sample of compound **2**, d. the reference sample of compound **2**. The eluent for TLC: petroleum ether : ethyl acetate = 2 : 1 (v/v).

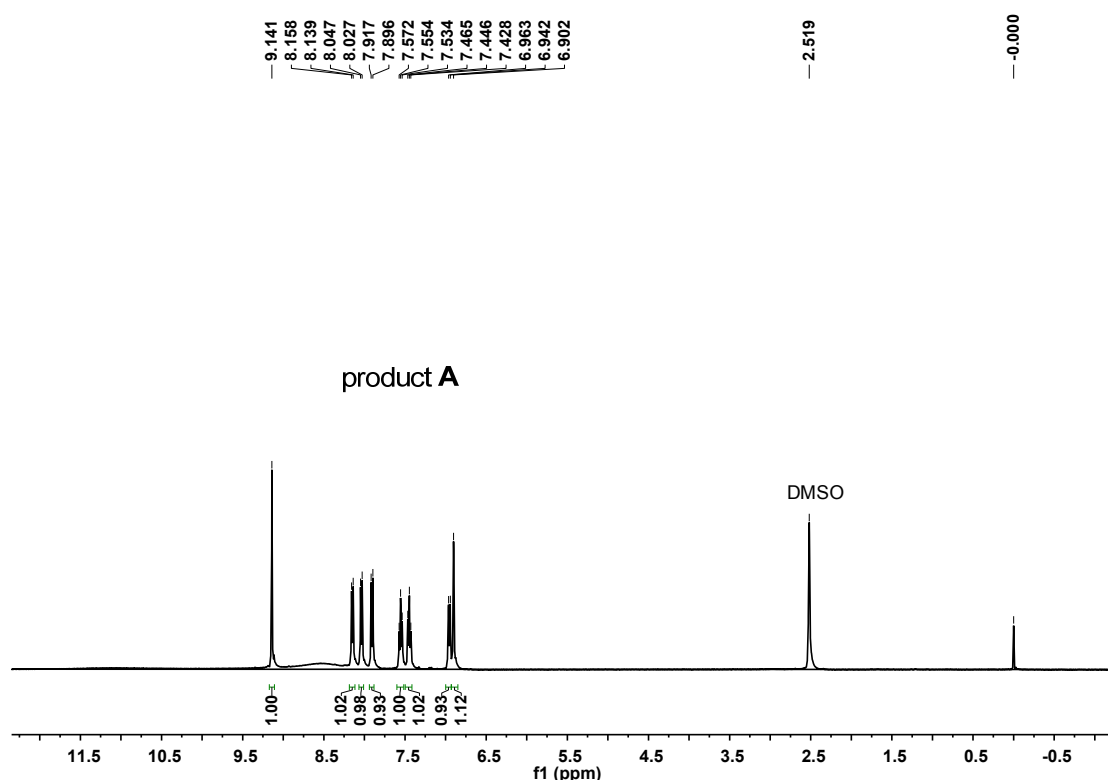

**Fig. S3**  $^1\text{H}$  NMR spectrum of product **A** in  $\text{DMSO}-d_6$ , which is identical to that of the reference sample of compound **2** (see above).

ZQ-27 #648 RT: 3.02 AV: 1 SB: 620 0.26-2.80 , 3.20-3.50 NL: 2.13E5  
T: + c Full ms [40.00-500.00]

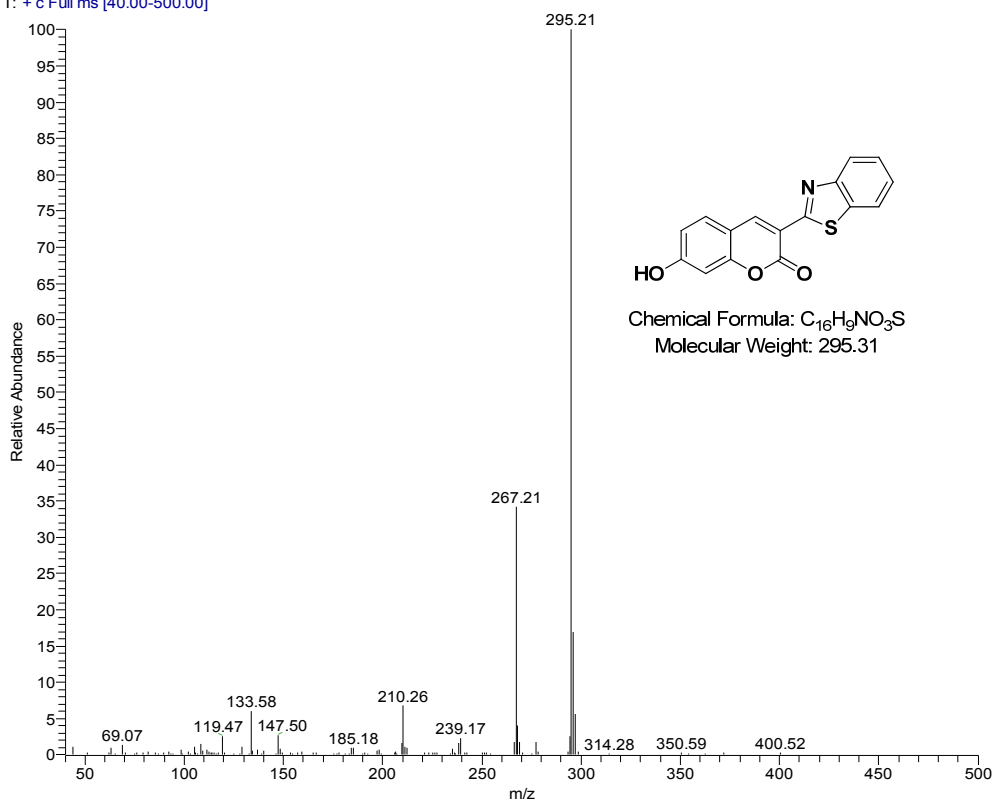

Fig. S4 Mass spectrum of product A, which shows the right mass of compound 2

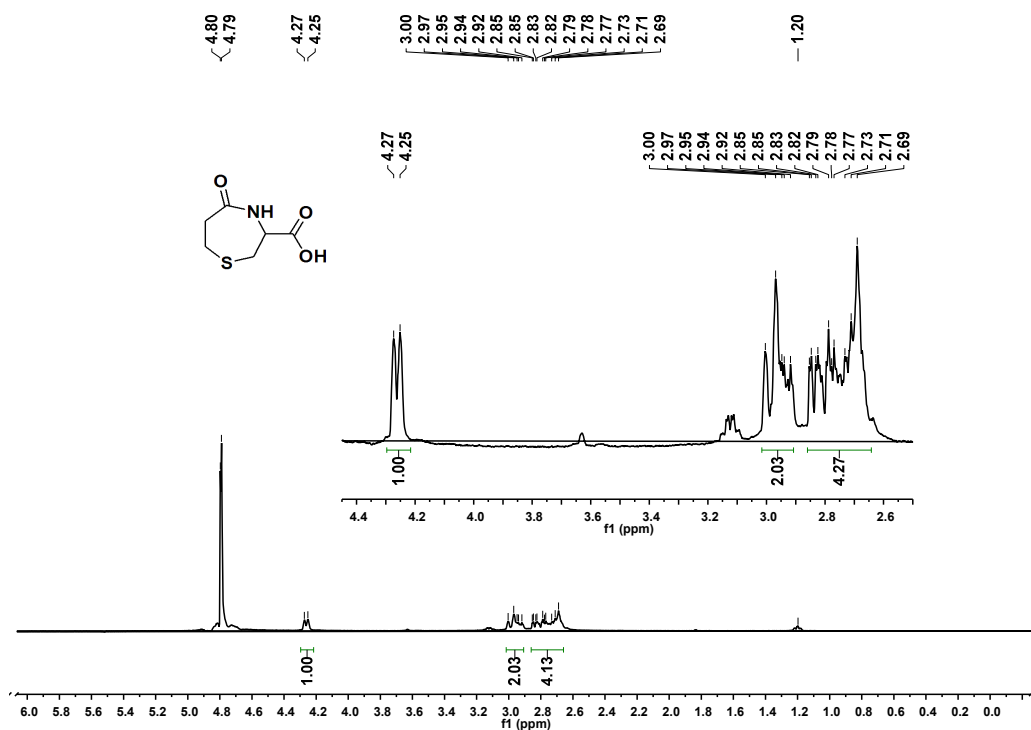

Fig. S5 <sup>1</sup>H-NMR spectrum of compound B in D<sub>2</sub>O, which is identical to the previously reported spectrum of 3, see Ref: X. Yang, Y. Guo and R. Strongin, *Angew. Chem., Int. Ed.*, 2011, **50**, 10690–10693, Figure S28 in the ESI of this paper.

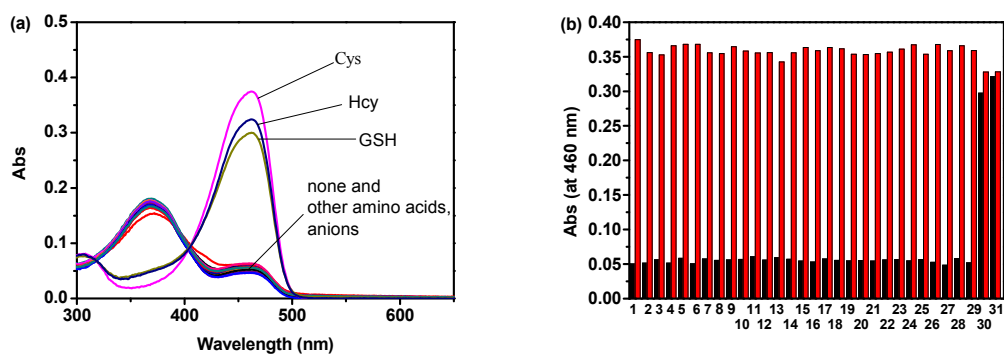

**Fig. S6** (a) UV-vis spectra changes of probe **1** (10  $\mu\text{M}$ ) upon addition of various analytes (100  $\mu\text{M}$ ). Cys, Hcy, and GSH were used 50  $\mu\text{M}$ . (b) Absorption changes of probe **1** (10  $\mu\text{M}$ ) at 460 nm for Cys (50  $\mu\text{M}$ ) in the presence of various analytes (100  $\mu\text{M}$ ). Black bars represent the addition of a single analyte. Red bars represent the subsequent addition of Cys to the mixture. Analytes 1-31: 1. none, 2.  $\text{F}^-$ , 3.  $\text{Cl}^-$ , 4.  $\text{Br}^-$ , 5.  $\text{I}^-$ , 6.  $\text{NO}_3^-$ , 7.  $\text{NO}_2^-$ , 8.  $\text{AcO}^-$ , 9.  $\text{SCN}^-$ , 10.  $\text{CO}_3^{2-}$ , 11.  $\text{SO}_4^{2-}$ , 12.  $\text{CN}^-$ , 13.  $\text{SO}_3^{2-}$ , 14.  $\text{S}_2\text{O}_3^{2-}$ , 15. Ala, 16. Glu, 17. Thr, 18. Trp, 19. Phe, 20. Gln, 21. Gly, 22. Lys, 23. Arg, 24. Ile, 25. Asp, 26. Leu, 27. Ser, 28. Met, 29. His, 30. GSH, 31. Hcy. Each spectrum was collected after 15 min of mixing each analyte with probe **1** in DMSO-PBS buffer (20 mM, pH 7.4, 1:1, v/v) at 37  $^\circ\text{C}$ .

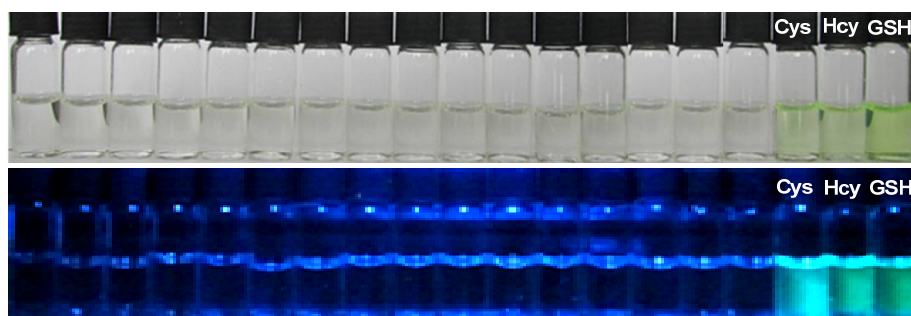

**Fig. S7** Color changes and fluorescence changes (under a 365 nm UV lamp) of probe **1** (10  $\mu\text{M}$ ) upon addition of various analytes (from left to right: none, Ala, Glu, Arg, Asp, Gln, Gly, His, Leu, Lys, Met, Phe, Trp, Ser, Ile, Thr, Cys, Hcy, and GSH. Except Hcy, GSH and Cys were used 50  $\mu\text{M}$ , others were use 100  $\mu\text{M}$ ).

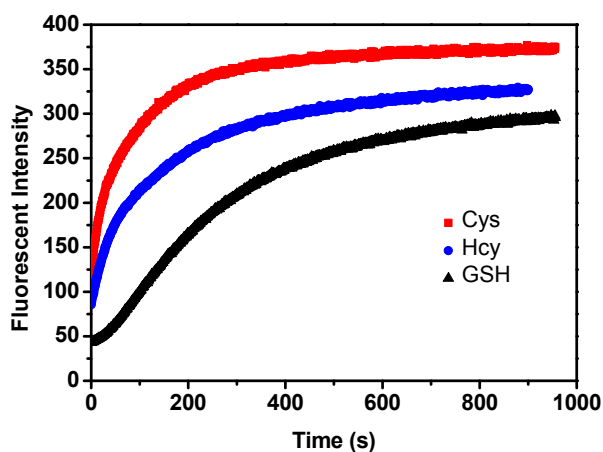

**Fig. S8** Fluorescent kinetics of probe **1** (10  $\mu\text{M}$ ) with 50  $\mu\text{M}$  of Cys, Hcy and GSH in DMSO-PBS buffer (20 mM, pH 7.4, 1:1, v/v) at 37  $^{\circ}\text{C}$ . The reactions are monitored at 498 nm with  $\lambda_{\text{ex}} = 458$  nm, slit:  $d_{\text{ex}} = d_{\text{em}} = 2.5$  nm.

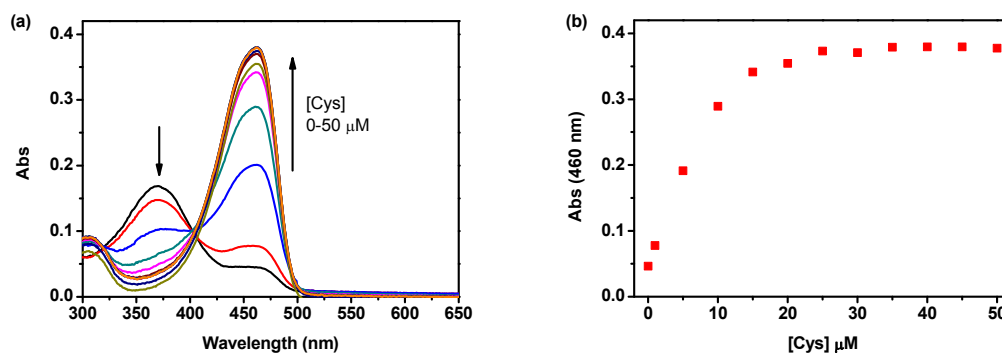

**Fig. S9** (a) UV/Vis absorption spectra of probe **1** (10  $\mu\text{M}$ ) upon addition of different concentrations of Cys in DMSO-PBS buffer (20 mM, pH 7.4, 1:1, v/v) at 37  $^{\circ}\text{C}$ . Final concentration of Cys: 0, 1, 5, 10, 15, 20, 25, 30, 35, 40, 45 and 50  $\mu\text{M}$ , respectively. (b) The changes of the absorbance intensity at 460 nm of probe **1** (10  $\mu\text{M}$ ) against concentration of Cys. Each spectrum was obtained 15 min after Cys addition.

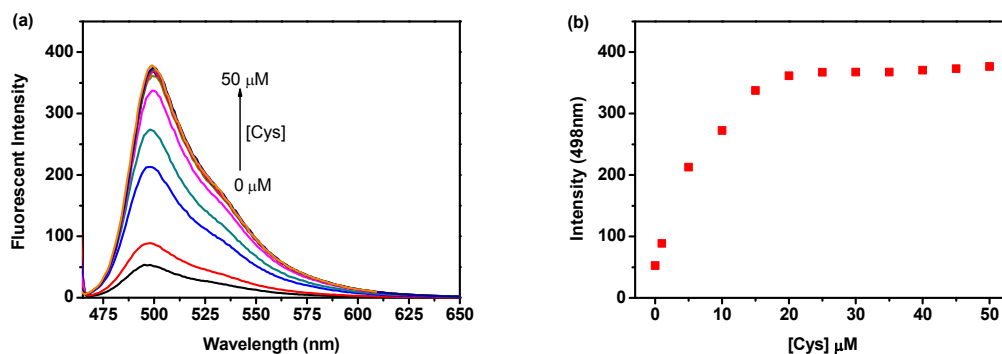

**Fig. S10** (a) Fluorescent spectra changes of probe **1** (10  $\mu\text{M}$ ) upon addition of different concentrations of Cys in DMSO-PBS buffer (20 mM, pH 7.4, 1:1, v/v) at 37  $^{\circ}\text{C}$ . Final concentration of Cys: 0, 1, 5, 10, 15, 20, 25, 30, 35, 40, 45 and 50  $\mu\text{M}$ , respectively. (b) Fluorescent intensity changes of probe **1** (10  $\mu\text{M}$ ) at 498 nm against concentration of Cys. Each spectrum was obtained 15 min after Cys addition.

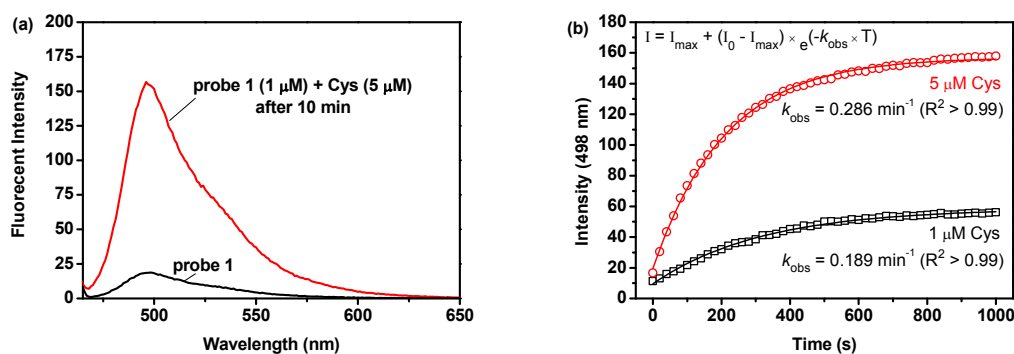

**Fig. S11** (a) Fluorescent spectra changes of probe **1** ( $1 \mu\text{M}$ ) upon addition of  $5 \mu\text{M}$  Cys after 10 min. (b) Fluorescence kinetics of probe **1** ( $1 \mu\text{M}$ ) monitored at 498 nm upon addition of Cys ( $1 \mu\text{M}$  and  $5 \mu\text{M}$ ) in DMSO-PBS buffer ( $20 \text{ mM}$ ,  $\text{pH } 7.4$ ,  $1:1$ ,  $v/v$ ) at  $37 \text{ }^\circ\text{C}$ . The kinetics data are fitted (solid line) by a first-order reaction scheme as shown in the figure, and the observed pseudo-first-order rate constant  $k_{\text{obs}}$  was also shown.  $\lambda_{\text{ex}} = 458 \text{ nm}$ ,  $d_{\text{ex}} = 2.5 \text{ nm}$ ,  $d_{\text{em}} = 5 \text{ nm}$ .

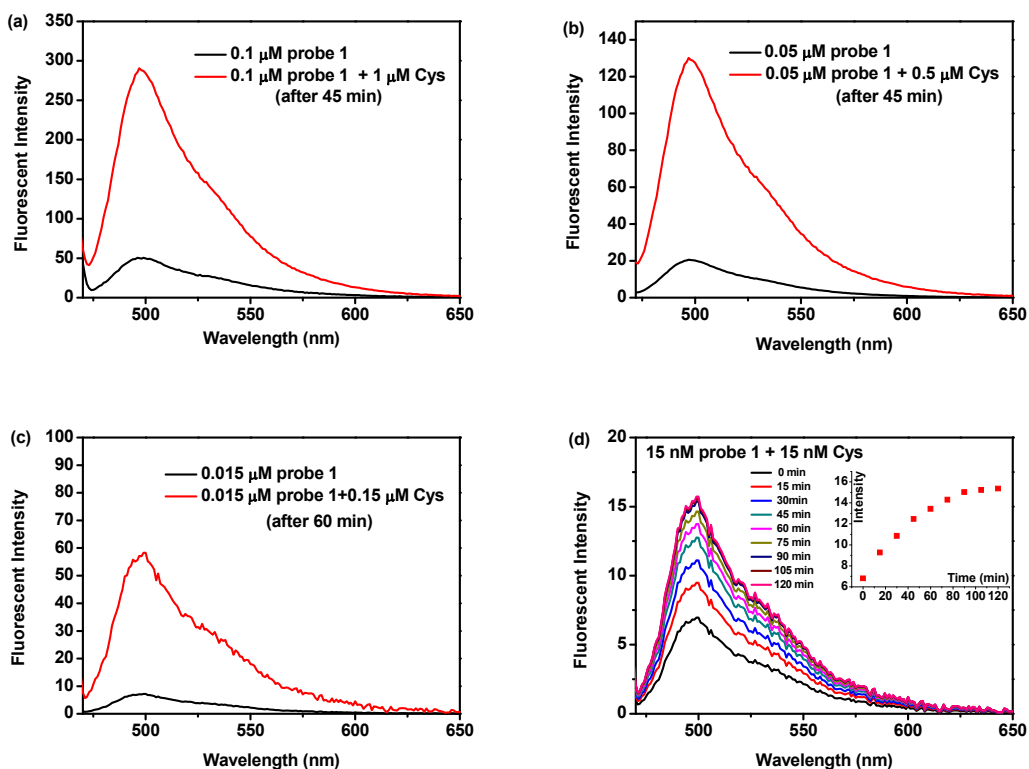

**Fig. S12** Detection of Cys using very low concentrations of probe **1** in DMSO-PBS buffer ( $20 \text{ mM}$ ,  $\text{pH } 7.4$ ,  $1:1$ ,  $v/v$ ) at  $37 \text{ }^\circ\text{C}$ .  $\lambda_{\text{ex}} = 458 \text{ nm}$ , slit for (a) and (b):  $d_{\text{ex}} = 5 \text{ nm}$ ,  $d_{\text{em}} = 10 \text{ nm}$ , for (c) and (d):  $d_{\text{ex}} = d_{\text{em}} = 10 \text{ nm}$ , respectively. Insert in (d): fluorescent intensity changes at 498 nm as a function of time.

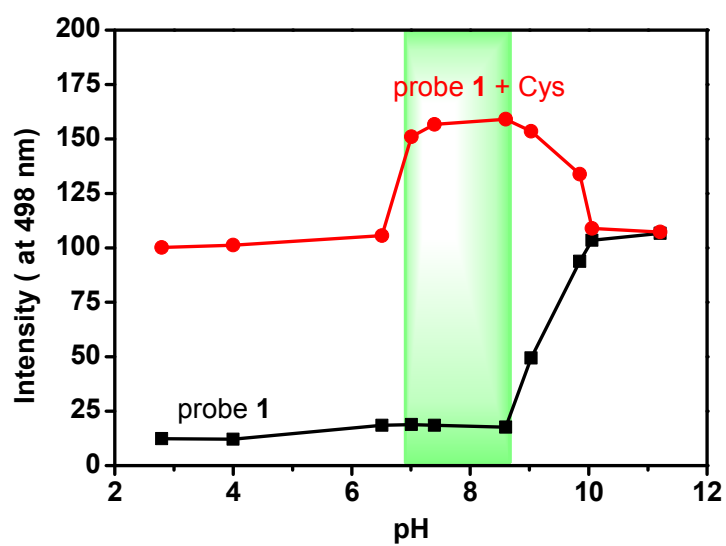

**Fig. S13** The effect of pH on the fluorescence intensity changes of probe **1** (1  $\mu\text{M}$ ) at 498 nm in absence and presence of Cys (5  $\mu\text{M}$ ) in DMSO-PBS buffer (20 mM, 1:1, v/v) at 37  $^{\circ}\text{C}$ . All the data was obtained 15 min after mixing.  $\lambda_{\text{ex}} = 458 \text{ nm}$ ,  $d_{\text{ex}} = 2.5 \text{ nm}$ ,  $d_{\text{em}} = 5 \text{ nm}$ . Green color area indicates the best working pH range for probe **1**.
